# Supplementary material
Source: PubMed Central journal article supplement (PMC5363075)
Supplement: NIHMS611312-supplement-01.pdf [file NIHMS611312-supplement-01.pdf]

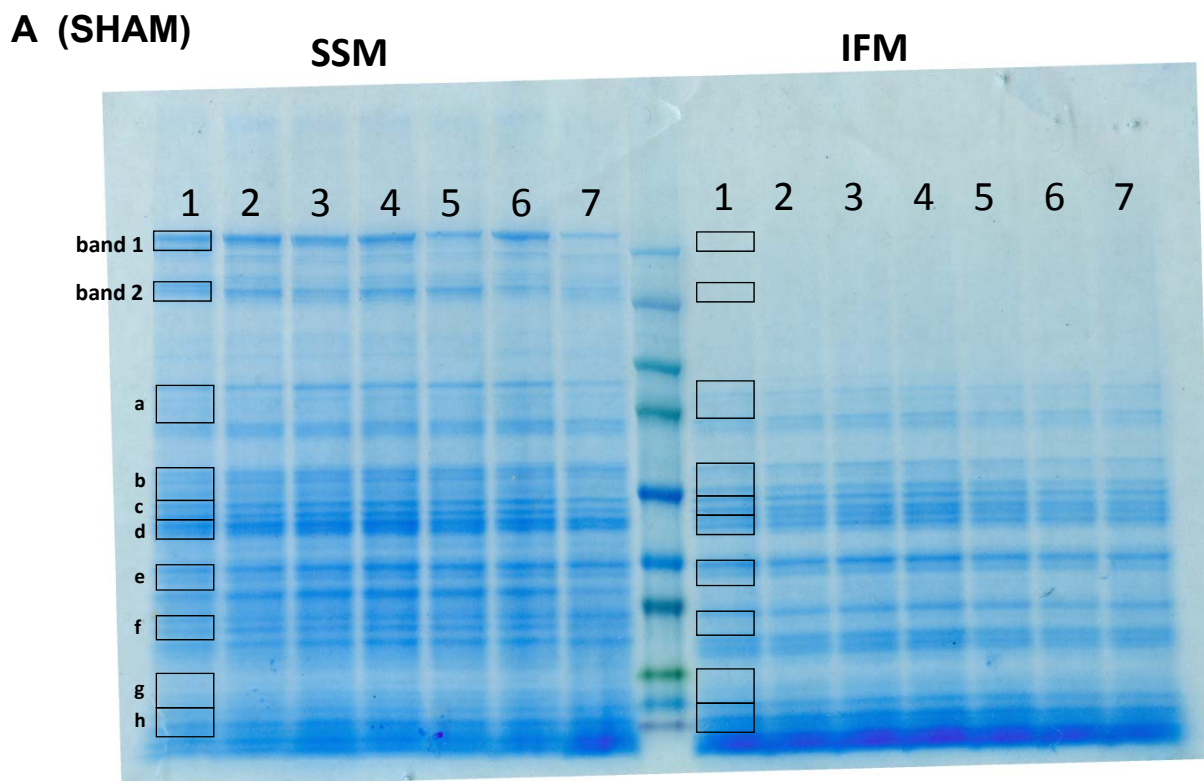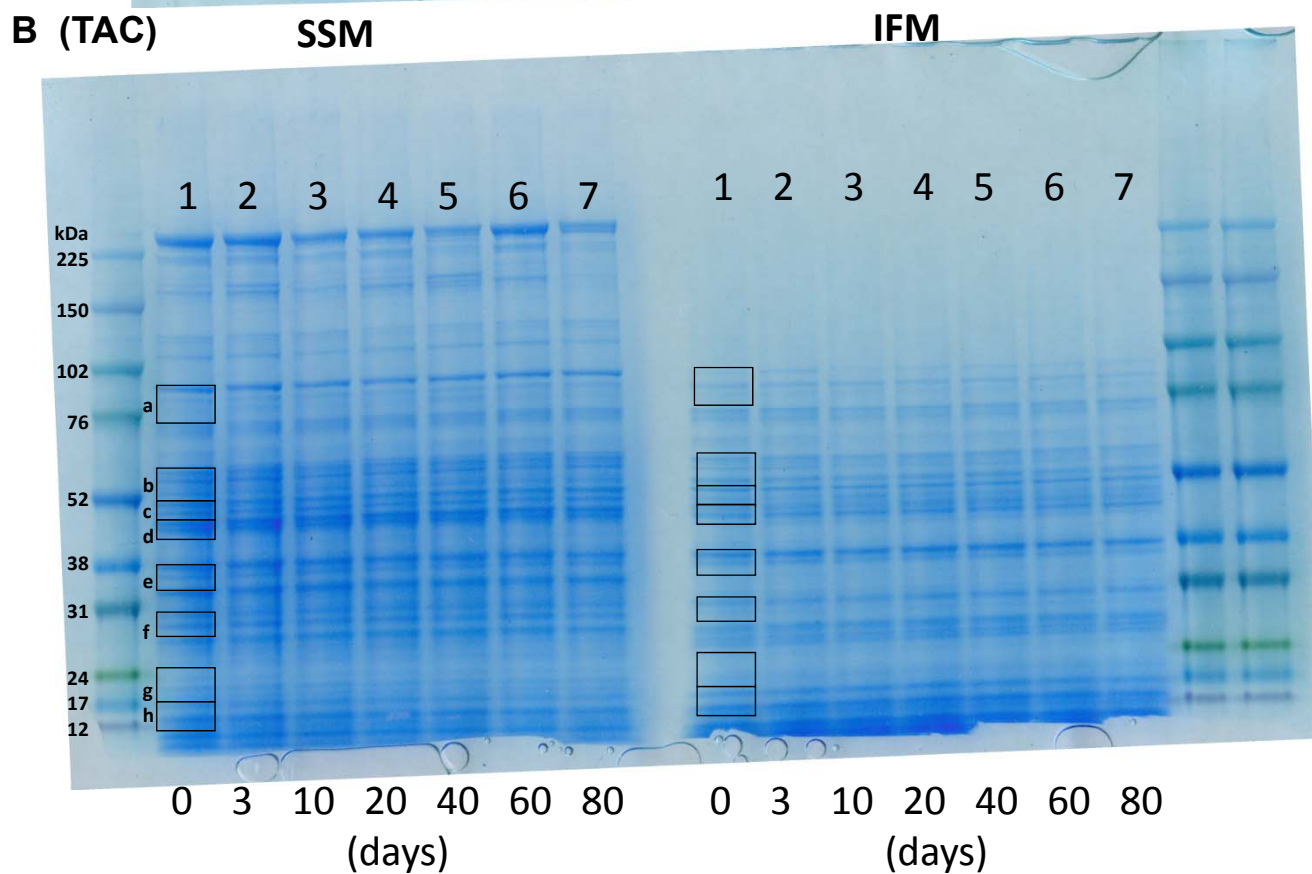

**Figure S1:** Isolation of cardiac mitochondrial proteins by gel electrophoresis. Hearts from sham and heart failure rats were removed. Proteins from subsarcolemmal mitochondria (SSM) and interfibrillar mitochondria (IFM) populations were isolated using SDS-PAGE and selected bands were analyzed by LC-MS/MS.

**Table S1- Body Water Enrichment profile in TAC and SHAM rats**

**(Each value represents the average of the measurements from 2 rats at each time point, which were differed less than 10%)**

| <b>Time (days)</b> | <b>SHAM</b> | <b>TAC</b>  |
|--------------------|-------------|-------------|
| <b>0</b>           | <b>0.00</b> | <b>0.00</b> |
| <b>3</b>           | <b>0.97</b> | <b>1.01</b> |
| <b>10</b>          | <b>1.43</b> | <b>2.40</b> |
| <b>20</b>          | <b>2.73</b> | <b>3.13</b> |
| <b>40</b>          | <b>3.23</b> | <b>3.46</b> |
| <b>60</b>          | <b>3.67</b> | <b>3.42</b> |
| <b>80</b>          | <b>3.43</b> | <b>3.47</b> |

**Table S2- List of proteins presented in both SSM and IFM fractions from both sham and heart failure groups**  
**(the proteins marked in red were used in kinetic analysis)**

| #  | ACCESSION #  | PROTEIN                                                                                                                       |
|----|--------------|-------------------------------------------------------------------------------------------------------------------------------|
| 1  | gi 53850628  | NADH-ubiquinone oxidoreductase 75 kDa subunit mitochondrial precursor [Rattus norvegicus]                                     |
| 2  | gi 25742739  | <b>long-chain-fatty-acid-CoA ligase 1 [Rattus norvegicus]</b>                                                                 |
| 3  | gi 40538860  | aconitate hydratase mitochondrial precursor [Rattus norvegicus]                                                               |
| 4  | gi 54792127  | ATP synthase subunit beta mitochondrial precursor [Rattus norvegicus]                                                         |
| 5  | gi 8393180   | cytochrome c oxidase subunit 4 isoform 1 mitochondrial precursor [Rattus norvegicus]                                          |
| 6  | gi 62079055  | isocitrate dehydrogenase [NADP] mitochondrial precursor [Rattus norvegicus]                                                   |
| 7  | gi 6981260   | NADH dehydrogenase [ubiquinone] 1 alpha subcomplex subunit 5 [Rattus norvegicus]                                              |
| 8  | gi 18426866  | 3-ketoacyl-CoA thiolase mitochondrial [Rattus norvegicus]                                                                     |
| 9  | gi 40538742  | ATP synthase subunit alpha mitochondrial precursor [Rattus norvegicus]                                                        |
| 10 | gi 189011657 | cytochrome b-c1 complex subunit 7 [Rattus norvegicus]                                                                         |
| 11 | gi 13786200  | voltage-dependent anion-selective channel protein 1 [Rattus norvegicus]                                                       |
| 12 | gi 32189350  | ADP/ATP translocase 2 [Rattus norvegicus]                                                                                     |
| 13 | gi 32189355  | ADP/ATP translocase 1 [Rattus norvegicus]                                                                                     |
| 14 | gi 39930503  | ATP synthase subunit gamma mitochondrial [Rattus norvegicus]                                                                  |
| 15 | gi 148747393 | trifunctional enzyme subunit alpha mitochondrial precursor [Rattus norvegicus]                                                |
| 16 | gi 6978703   | carnitine O-palmitoyltransferase 1 muscle isoform [Rattus norvegicus]                                                         |
| 17 | gi 18426858  | succinate dehydrogenase [ubiquinone] flavoprotein subunit mitochondrial precursor [Rattus norvegicus]                         |
| 18 | gi 42476181  | malate dehydrogenase mitochondrial precursor [Rattus norvegicus]                                                              |
| 19 | gi 1557127   | NAD(P) transhydrogenase mitochondrial [Rattus norvegicus]                                                                     |
| 20 | gi 6980972   | aspartate aminotransferase mitochondrial [Rattus norvegicus]                                                                  |
| 21 | gi 3796202   | voltage-dependent anion-selective channel protein 2 [Rattus norvegicus]                                                       |
| 22 | gi 13786204  | voltage-dependent anion-selective channel protein 3 [Rattus norvegicus]                                                       |
| 23 | gi 55741544  | cytochrome b-c1 complex subunit 2 mitochondrial precursor [Rattus norvegicus]                                                 |
| 24 | gi 58865384  | NADH dehydrogenase [ubiquinone] iron-sulfur protein 2 mitochondrial precursor [Rattus norvegicus]                             |
| 25 | gi 6978435   | very long-chain specific acyl-CoA dehydrogenase mitochondrial precursor [Rattus norvegicus]                                   |
| 26 | gi 52138635  | <b>electron transfer flavoprotein-ubiquinone oxidoreductase mitochondrial precursor [Rattus norvegicus]</b>                   |
| 27 | gi 51948476  | cytochrome b-c1 complex subunit 1 mitochondrial precursor [Rattus norvegicus]                                                 |
| 28 | gi 198386332 | <b>fumarylacetoacetate hydrolase domain-containing protein 2 [Rattus norvegicus]</b>                                          |
| 29 | gi 8393418   | <b>glyceroldehyde-3-phosphate dehydrogenase [Rattus norvegicus]</b>                                                           |
| 30 | gi 13242293  | <b>hydroxymethylglutaryl-CoA lyase mitochondrial precursor [Rattus norvegicus]</b>                                            |
| 31 | gi 14183666  | <b>cytochrome c oxidase subunit II (mitochondrion) [Rattus norvegicus]</b>                                                    |
| 32 | gi 14183666  | aldehyde dehydrogenase mitochondrial precursor [Rattus norvegicus]                                                            |
| 33 | gi 156749584 | succinyl-CoA ligase [ADP-forming] subunit beta mitochondrial [Rattus norvegicus]                                              |
| 34 | gi 68341995  | NADH dehydrogenase [ubiquinone] iron-sulfur protein 4 mitochondrial precursor [Rattus norvegicus]                             |
| 35 | gi 56606108  | <b>NADH dehydrogenase [ubiquinone] iron-sulfur protein 7 mitochondrial [Rattus norvegicus]</b>                                |
| 36 | gi 16758404  | peroxiredoxin-5 mitochondrial precursor [Rattus norvegicus]                                                                   |
| 37 | gi 20806153  | <b>ATP synthase subunit delta mitochondrial precursor [Rattus norvegicus]</b>                                                 |
| 38 | gi 8394328   | superoxide dismutase [Cu-Zn] [Rattus norvegicus]                                                                              |
| 39 | gi 164565371 | NADH dehydrogenase (ubiquinone) 1 alpha subcomplex 12 [Rattus norvegicus]                                                     |
| 40 | gi 157821497 | <b>NADH dehydrogenase [ubiquinone] iron-sulfur protein 8 mitochondrial [Rattus norvegicus]</b>                                |
| 41 | gi 5690293   | pyruvate dehydrogenase E1 component subunit beta mitochondrial precursor [Rattus norvegicus]                                  |
| 42 | gi 24233541  | cytochrome c oxidase subunit 5A mitochondrial precursor [Rattus norvegicus]                                                   |
| 43 | gi 6758230   | propionyl-CoA decarboxylase mitochondrial [Rattus norvegicus]                                                                 |
| 44 | gi 145651820 | methionylmalonate-semialdehyde dehydrogenase [acylating] mitochondrial precursor [Rattus norvegicus]                          |
| 45 | gi 8394449   | <b>mitochondrial import inner membrane translocase subunit TIM44 [Rattus norvegicus]</b>                                      |
| 46 | gi 19705465  | <b>ATP synthase subunit b mitochondrial precursor [Rattus norvegicus]</b>                                                     |
| 47 | gi 51854229  | <b>carnitine O-acetyltransferase [Rattus norvegicus]</b>                                                                      |
| 48 | gi 25742626  | <b>apoptosis-inducing factor 1 mitochondrial precursor [Rattus norvegicus]</b>                                                |
| 49 | gi 11693170  | <b>mitochondrial 2-oxoglutarate/malate carrier protein [Rattus norvegicus]</b>                                                |
| 50 | gi 55741520  | <b>enoyl-CoA delta isomerase 2 mitochondrial [Rattus norvegicus]</b>                                                          |
| 51 | gi 83977457  | 3-hydroxyisobutyrate dehydrogenase mitochondrial precursor [Rattus norvegicus]                                                |
| 52 | gi 18426858  | succinate dehydrogenase [ubiquinone] flavoprotein subunit mitochondrial precursor [Rattus norvegicus]                         |
| 53 | gi 20306141  | phosphate carrier protein mitochondrial precursor [Rattus norvegicus]                                                         |
| 54 | gi 17530977  | <b>enoyl-CoA hydratase mitochondrial precursor [Rattus norvegicus]</b>                                                        |
| 55 | gi 17105336  | hydroxyacyl-coenzyme A dehydrogenase mitochondrial precursor [Rattus norvegicus]                                              |
| 56 | gi 77628000  | <b>omega-amidase NIT2 [Rattus norvegicus]</b>                                                                                 |
| 57 | gi 20302049  | <b>NADH-cytochrome b5 reductase 3 [Rattus norvegicus]</b>                                                                     |
| 58 | gi 6981146   | <b>L-lactate dehydrogenase B chain [Rattus norvegicus]</b>                                                                    |
| 59 | gi 198386332 | <b>fumarylacetoacetate hydrolase domain-containing protein 2 [Rattus norvegicus]</b>                                          |
| 60 | gi 78365255  | dihydropyridyllysine-residue acetyltransferase component of pyruvate dehydrogenase complex mitochondrial [Rattus norvegicus]  |
| 61 | gi 110189666 | <b>[Rattus cytochrome c oxidase subunit II (mitochondrion) [Rattus norvegicus]</b>                                            |
| 62 | gi 209919614 | <b>succinate dehydrogenase [ubiquinone] iron-sulfur subunit mitochondrial precursor [Rattus norvegicus]</b>                   |
| 63 | gi 52138624  | <b>mitochondrial carnitine/acylcarnitine carrier protein [Rattus norvegicus]</b>                                              |
| 64 | gi 110189672 | <b>NADH dehydrogenase subunit 4 (mitochondrion) [Rattus norvegicus]</b>                                                       |
| 65 | gi 69811212  | isovaleryl-CoA dehydrogenase mitochondrial precursor [Rattus norvegicus]                                                      |
| 66 | gi 48675862  | acyl-coenzyme A thioesterase 2 mitochondrial [Rattus norvegicus]                                                              |
| 67 | gi 189083744 | creatine kinase S-type mitochondrial precursor [Rattus norvegicus]                                                            |
| 68 | gi 11693174  | branched-chain-amino-acid aminotransferase mitochondrial precursor [Rattus norvegicus]                                        |
| 69 | gi 158303308 | propionyl-CoA carboxylase alpha chain mitochondrial [Rattus norvegicus]                                                       |
| 70 | gi 40786469  | dihydropyridyl dehydrogenase mitochondrial precursor [Rattus norvegicus]                                                      |
| 71 | gi 148747119 | propionyl-CoA carboxylase beta chain mitochondrial precursor [Rattus norvegicus]                                              |
| 72 | gi 6980956   | glutamate dehydrogenase 1 mitochondrial precursor [Rattus norvegicus]                                                         |
| 73 | gi 62945278  | 2-oxoglutarate dehydrogenase mitochondrial precursor [Rattus norvegicus]                                                      |
| 74 | gi 12018236  | thioredoxin reductase 2 mitochondrial precursor [Rattus norvegicus]                                                           |
| 75 | gi 56905722  | <b>serine hydroxymethyltransferase mitochondrial [Rattus norvegicus]</b>                                                      |
| 76 | gi 6978705   | <b>carnitine O-palmitoyltransferase 2 mitochondrial precursor [Rattus norvegicus]</b>                                         |
| 77 | gi 11693166  | <b>mitochondrial-processing peptidase subunit beta precursor [Rattus norvegicus]</b>                                          |
| 78 | gi 54234052  | <b>mitochondrial-processing peptidase subunit alpha [Rattus norvegicus]</b>                                                   |
| 79 | gi 195927000 | <b>dihydropyridyllysine-residue succinyltransferase component of 2-oxoglutarate dehydrogenase complex [Rattus norvegicus]</b> |
| 80 | gi 270288740 | <b>mitochondrial amine oxidase [flavin-containing] A [Rattus norvegicus]</b>                                                  |
| 81 | gi 51948412  | <b>electron transfer flavoprotein subunit beta [Rattus norvegicus]</b>                                                        |
| 82 | gi 50054266  | <b>neurolysin mitochondrial precursor [Rattus norvegicus]</b>                                                                 |
| 83 | gi 189181716 | <b>succinyl-CoA:3-ketoacid-coenzyme A transferase 1 mitochondrial precursor [Rattus norvegicus]</b>                           |
| 84 | gi 55741424  | <b>NADH dehydrogenase [ubiquinone] flavoprotein 1 mitochondrial precursor [Rattus norvegicus]</b>                             |
| 85 | gi 157818027 | <b>acetyl-coenzyme A synthetase 2-like mitochondrial [Rattus norvegicus]</b>                                                  |
| 86 | gi 20302061  | <b>ATP synthase subunit O mitochondrial precursor [Rattus norvegicus]</b>                                                     |
| 87 | gi 157820807 | <b>glutaryl-CoA dehydrogenase mitochondrial [Rattus norvegicus]</b>                                                           |
| 88 | gi 7709992   | <b>basigin isoform 2 precursor [Rattus norvegicus]</b>                                                                        |
| 89 | gi 58865534  | <b>ubiquinone biosynthesis monooxygenase COQ6 precursor [Rattus norvegicus]</b>                                               |
| 90 | gi 197313734 | <b>acyl-CoA dehydrogenase family member 9 mitochondrial [Rattus norvegicus]</b>                                               |

**Table S3- Proteins identified in band 1 and 2 (Figure S1) in SSM and IFM fractions. Only baseline samples (t= 0 hr) in sham group was analyzed. Proteomic analysis revealed that the higher molecular weight bands in SSM fraction mainly represent heavy-chain myosin contaminants.**

| #  | Accession | Protein                                                                             | MW [kDa] | Band 1 |      | IFM   |      | Band 2 |      | Sore  | S.C. |
|----|-----------|-------------------------------------------------------------------------------------|----------|--------|------|-------|------|--------|------|-------|------|
|    |           |                                                                                     |          | SSM    | S.C. | Score | S.C. | SSM    | S.C. |       |      |
| 1  | 564386121 | PREDICTED: myosin-6 isoform X2                                                      | 223.2    | 4255.1 | 1399 | -     | -    | 3222.1 | 1053 | -     | -    |
| 2  | 564386123 | PREDICTED: myosin-7 isoform X1                                                      | 222.8    | 3654.0 | 1218 | -     | -    | 3323.6 | 1097 | -     | -    |
| 3  | 106879208 | myosin-4                                                                            | 222.7    | 1679.3 | 566  | -     | -    | -      | -    | -     | -    |
| 4  | 6981234   | myosin-3                                                                            | 223.7    | 1399.7 | 475  | -     | -    | -      | -    | -     | -    |
| 5  | 564350262 | PREDICTED: chromodomain-helicase-DNA-binding protein 7 isoform X3                   | 333.6    | 161.1  | 65   | -     | -    | -      | -    | -     | -    |
| 6  | 32189355  | ADP/ATP translocase 1                                                               | 33.0     | 69.5   | 26   | -     | -    | 141.2  | 53   | 22.1  | 9    |
| 7  | 564379379 | PREDICTED: restin isoform X7                                                        | 241.4    | 57.0   | 22   | -     | -    | -      | -    | -     | -    |
| 8  | 564335344 | PREDICTED: NAD(P) transhydrogenase, mitochondrial isoform X2                        | 113.8    | 52.8   | 19   | 15.5  | 7    | 126.2  | 45   | 129.6 | 51   |
| 9  | 71043650  | serine/threonine-protein kinase SRPK1                                               | 73.8     | 52.1   | 22   | -     | -    | -      | -    | -     | -    |
| 10 | 564340113 | PREDICTED: spectrin alpha chain, non-erythrocytic 1 isoform X9                      | 282.2    | 41.8   | 16   | -     | -    | 84.1   | 34   | -     | -    |
| 11 | 564382509 | PREDICTED: ecotropic viral integration site 5 isoform X11                           | 90.3     | 38.7   | 14   | -     | -    | -      | -    | -     | -    |
| 12 | 564302435 | PREDICTED: titin                                                                    | 3939.4   | 33.8   | 12   | -     | -    | -      | -    | -     | -    |
| 13 | 157817117 | F-box/LRR-repeat protein 19                                                         | 55.8     | 28.0   | 11   | -     | -    | -      | -    | -     | -    |
| 14 | 564346142 | PREDICTED: centrosomal protein of 41 kDa isoform X1                                 | 41.3     | 24.7   | 10   | -     | -    | -      | -    | -     | -    |
| 15 | 564358903 | PREDICTED: small subunit processome component 20 homolog isoform X1                 | 317.0    | 24.7   | 10   | -     | -    | 23.5   | 10   | -     | -    |
| 16 | 564316087 | PREDICTED: immunoglobulin-like domain containing receptor 2 isoform X7              | 69.7     | 20.3   | 8    | -     | -    | -      | -    | -     | -    |
| 17 | 564376996 | PREDICTED: poly [ADP-ribose] polymerase 9 isoform X4                                | 74.6     | 18.3   | 13   | -     | -    | -      | -    | -     | -    |
| 18 | 564392930 | PREDICTED: adenomatous polyposis coli protein isoform X9                            | 308.1    | 18.2   | 7    | -     | -    | -      | -    | -     | -    |
| 19 | 564303636 | PREDICTED: von Willebrand factor D and EGF domain-containing protein                | 196.8    | 16.7   | 7    | -     | -    | 22.4   | 9    | -     | -    |
| 20 | 157821969 | arf-GAP with Rho-GAP domain, ANK repeat and PH domain-containing protein 2          | 189.7    | 16.1   | 6    | -     | -    | -      | -    | -     | -    |
| 21 | 564379381 | PREDICTED: restin isoform X8                                                        | 240.2    | -      | -    | -     | -    | 113.8  | 42   | -     | -    |
| 22 | 9506955   | furin precursor                                                                     | 86.6     | -      | -    | -     | -    | 84.0   | 30   | -     | -    |
| 23 | 564302468 | PREDICTED: LOW QUALITY PROTEIN: ryanodine receptor 3                                | 546.8    | -      | -    | -     | -    | 38.5   | 16   | -     | -    |
| 24 | 564313516 | PREDICTED: nucleosome-remodeling factor subunit BPTF isoform X5                     | 305.2    | -      | -    | -     | -    | 36.3   | 14   | -     | -    |
| 25 | 564355172 | PREDICTED: dystrobrevin beta isoform X8                                             | 61.0     | -      | -    | -     | -    | 30.8   | 13   | -     | -    |
| 26 | 564400349 | PREDICTED: histone-lysine N-methyltransferase 2D-like isoform X9                    | 588.9    | -      | -    | -     | -    | 27.5   | 11   | -     | -    |
| 27 | 564351052 | PREDICTED: E3 ubiquitin-protein ligase BRE1A isoform X3                             | 94.5     | -      | -    | -     | -    | 27.0   | 10   | -     | -    |
| 28 | 564382345 | PREDICTED: laminin, beta 3 isoform X3                                               | 125.2    | -      | -    | -     | -    | 23.7   | 10   | -     | -    |
| 29 | 564318771 | PREDICTED: mucin-17-like isoform X5                                                 | 113.9    | -      | -    | -     | -    | 22.2   | 10   | -     | -    |
| 30 | 564335094 | PREDICTED: microtubule-associated serine/threonine-protein kinase 4-like isoform X9 | 257.7    | -      | -    | -     | -    | 16.4   | 7    | -     | -    |
